# Supplementary material
Source: MDPI journal article supplement (https://www.mdpi.com/1424-8247/15/2/165)
Supplement: s1 [file s1]

## Supplementary Materials

# Novel Small-Molecule Inhibitors of the SARS-CoV-2 Spike Protein Binding to Neuropilin 1

Anja Kolarič <sup>1</sup>, Marko Jukič <sup>1,2,\*</sup> and Urban Bren <sup>1,2,\*</sup>

<sup>1</sup> Faculty of Chemistry and Chemical Engineering, University of Maribor, Smetanova 17, SI-2000 Maribor, Slovenia

<sup>2</sup> Faculty of Mathematics, Natural Sciences and Information Technologies, University of Primorska, Glagoljaška 8, SI-6000 Koper, Slovenia

\* Correspondence: marko.jukic@um.si; Tel: +386 2 2294 428 (M.J.) and urban.bren@um.si; Tel: + 386 2 22 94 421 (U.B.)

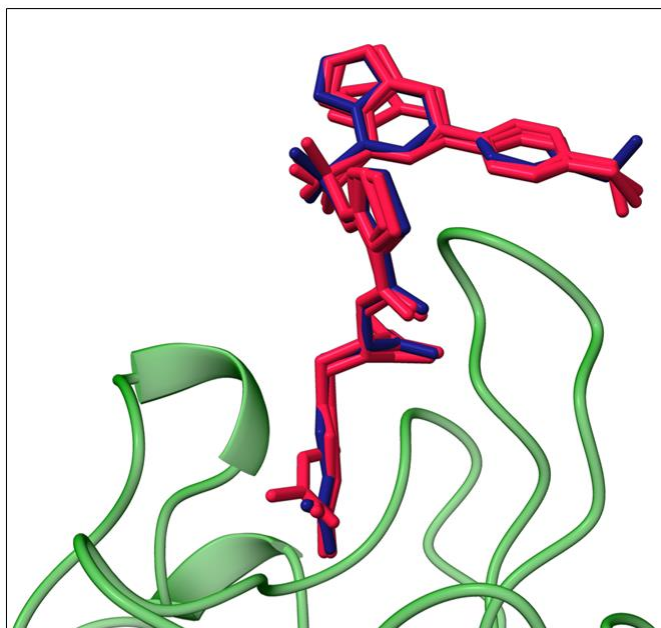

**Figure S1.** Spatial comparison of the natively present EG01377 conformation and its calculated docked poses for the molecular docking validation. The co-crystallized conformation is represented in blue, while its re-produced docked poses are depicted in red. NRP1 is colored in green.

### GOLD configuration file

#### AUTOMATIC SETTINGS

autoscale = 2

#### POPULATION

popsiz = auto

select\_pressure = auto

n\_islands = auto

maxops = auto

niche\_siz = auto

#### GENETIC OPERATORS

pt\_crosswt = auto

allele\_mutatewt = auto

migratewt = auto

#### FLOOD FILL

radius = 10

origin = 0 0 0

do\_cavity = 1

floodfill\_atom\_no = 0

floodfill\_center = cavity\_from\_ligand 17  
atoms

#### DATA FILES

param\_file = DEFAULT

set\_ligand\_atom\_types = 1

set\_protein\_atom\_types = 0

tordist\_file = DEFAULT

make\_subdirs = 0

save\_lone\_pairs = 0

fit\_points\_file = fit\_pts.mol2

read\_fitpts = 0

#### FLAGS

internal\_ligand\_h\_bonds = 0

flip\_free\_corners = 0

match\_ring\_templates = 0

flip\_amide\_bonds = 0

flip\_planar\_n = 1 flip\_ring\_NRR

flip\_ring\_NHR

flip\_pyramidal\_n = 0

rotate\_carboxylic\_oh = flip

use\_tordist = 1

postprocess\_bonds = 1

rotatable\_bond\_override\_file = DEFAULT

solvate\_all = 1

#### TERMINATION

early\_termination = 1

n\_top\_solutions = 3

rms\_tolerance = 1

#### CONSTRAINTS

force\_constraints = 0

**COVALENT BONDING**

covalent = 0

clean\_up\_option delete\_all\_log\_files

output\_file\_format = MACCS

**SAVE OPTIONS**

save\_score\_in\_file = 1

save\_protein\_torsions = 0

clean\_up\_option save\_top\_n\_solutions 3

clean\_up\_option

delete\_redundant\_log\_files

clean\_up\_option

delete\_all\_initialised\_ligands

clean\_up\_option delete\_empty\_directories

clean\_up\_option delete\_rank\_file

**FITNESS FUNCTION SETTINGS**

initial\_virtual\_pt\_match\_max = 3

relative\_ligand\_energy = 1

gold\_fitfunc\_path = plp

score\_param\_file = DEFAULT

**CONSTRAINTS**

constraint protein\_h\_bond 10.0000

0.005000 1215 1305 1167 411 754 755

**Table S1.** ZINC15 [1] name and MolPort ID (vendor) of top 20 compounds obtained from molecular docking.

| COMPOUND            | ZINC15 NAME      | MolPort ID          |
|---------------------|------------------|---------------------|
| 1                   | ZINC000390834636 | MolPort-039-314-631 |
| 2                   | ZINC000065529168 | MolPort-019-672-384 |
| 3                   | ZINC000070040863 | MolPort-020-084-791 |
| 4                   | ZINC000024451999 | MolPort-009-171-237 |
| 5                   | ZINC000020732290 | MolPort-006-814-244 |
| 6                   | ZINC000057997476 | MolPort-009-073-388 |
| 7                   | ZINC000015721546 | MolPort-002-516-537 |
| 8                   | ZINC000012428013 | MolPort-002-749-663 |
| 9                   | ZINC000003295631 | MolPort-004-259-418 |
| 10                  | ZINC000095995534 | MolPort-028-795-075 |
| 11                  | ZINC000058026820 | MolPort-009-102-148 |
| 12                  | ZINC000048326459 | MolPort-009-073-421 |
| 13                  | ZINC000008584635 | MolPort-007-627-531 |
| 14                  | ZINC000003271207 | MolPort-004-257-684 |
| 15                  | ZINC000003319242 | MolPort-004-262-387 |
| 16                  | ZINC000008708441 | MolPort-005-566-437 |
| 17                  | ZINC000012769255 | MolPort-005-749-385 |
| 18                  | ZINC000426477237 | MolPort-042-631-013 |
| 19                  | ZINC000036360945 | MolPort-008-317-429 |
| 20                  | ZINC000009422900 | MolPort-005-913-364 |
| 21<br>(EG00229) [2] |                  | MolPort-046-416-868 |
| 22 [3]              |                  | MolPort-003-000-781 |

## REFERENCES

1. ZINC. Available online: <https://zinc15.docking.org/> (accessed Oct 6, 2021)
2. Jarvis, A.; Allerston, C. K.; Jia, H.; Herzog, B.; Garza-Garcia, A.; Winfield, N.; Ellard, K.; Aqil, R.; Lynch, R.; Chapman, C.; Hartzoulakis, B.; Nally, J.; Stewart, M.; Cheng, L.; Menon, M.; Tickner, M.; Djordjevic, S.; Driscoll, P. C.; Zachary, I.; Selwood, D. L. Small molecule inhibitors of the neuropilin-1 vascular endothelial growth factor A (VEGF-A) interaction. *J. Med. Chem.* 2010, 53, 2215-2226. DOI: 10.1021/jm901755g.
3. Perez-Miller, S.; Patek, M.; Moutal, A.; Duran, P.; Cabel, C. R.; Thorne, C. A.; Campos, S. K.; Khanna, R. Novel compounds targeting neuropilin receptor 1 with potential to interfere with SARS-CoV-2 virus entry. *ACS Chem. Neurosci.* 2021, 12, 1299-1312. DOI: 10.1021/acscchemneuro.0c00619.
